# Supplementary material
Source: PubMed Central journal article supplement (PMC4641093)

# **Do surgeons' work styles predict treatment?**

Orthopaedic Hand and Upper Extremity Service

Massachusetts General Hospital - Harvard Medical School

# 1. Displaced clavicle shaft fracture 1

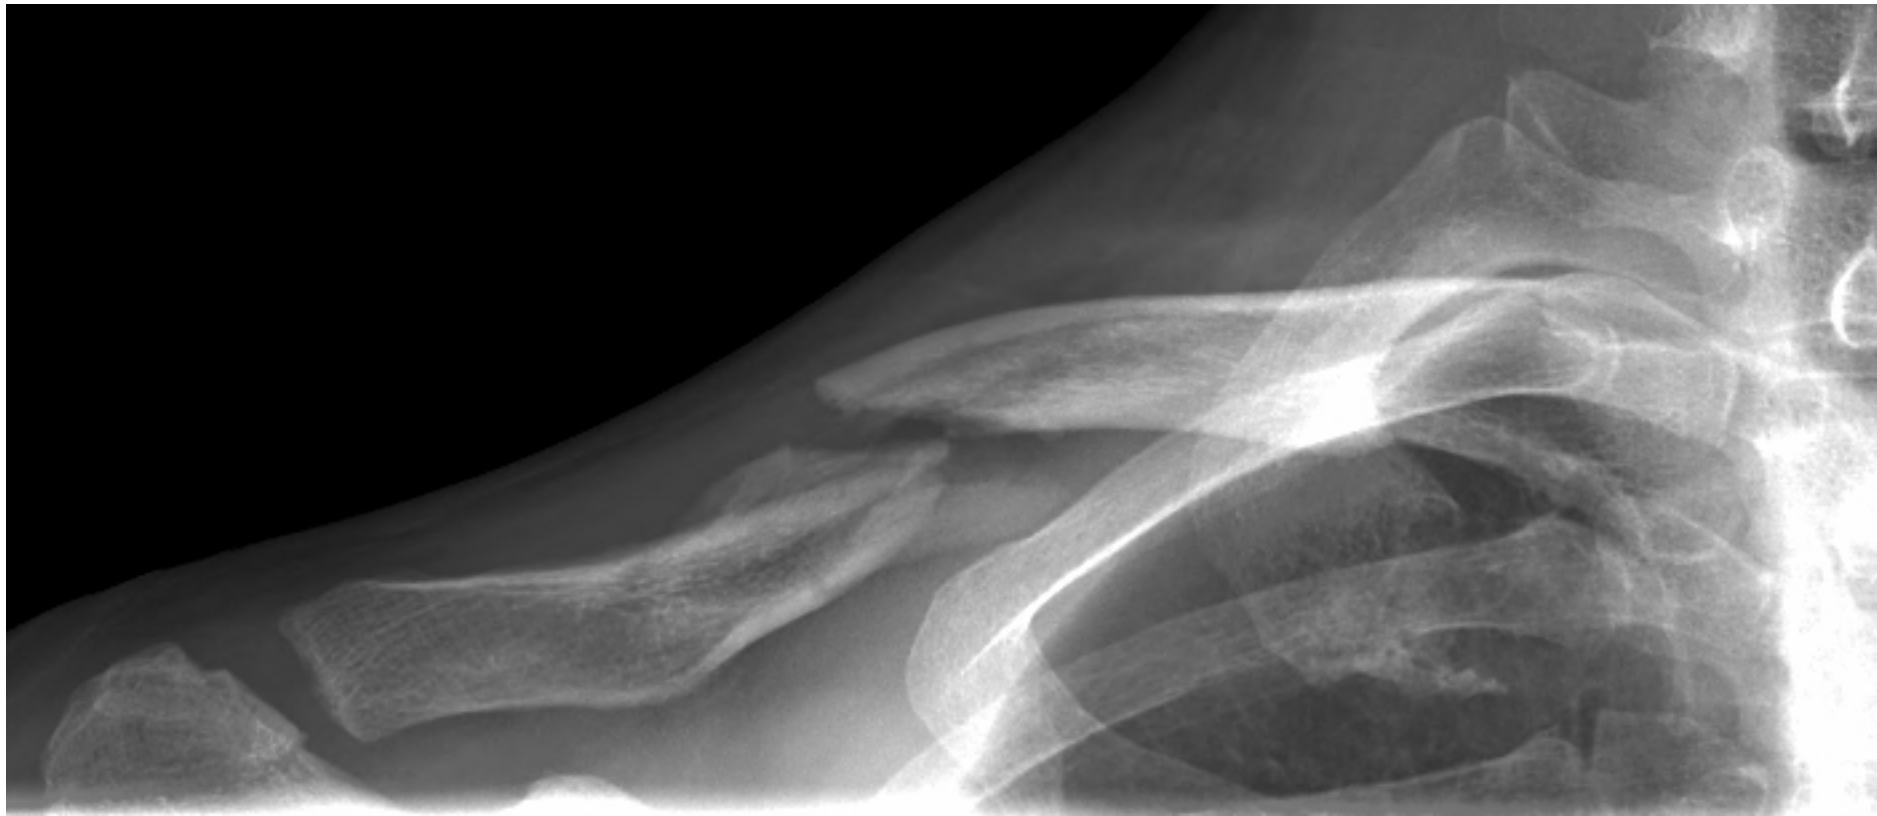

# 1. Displaced clavicle shaft fracture 2

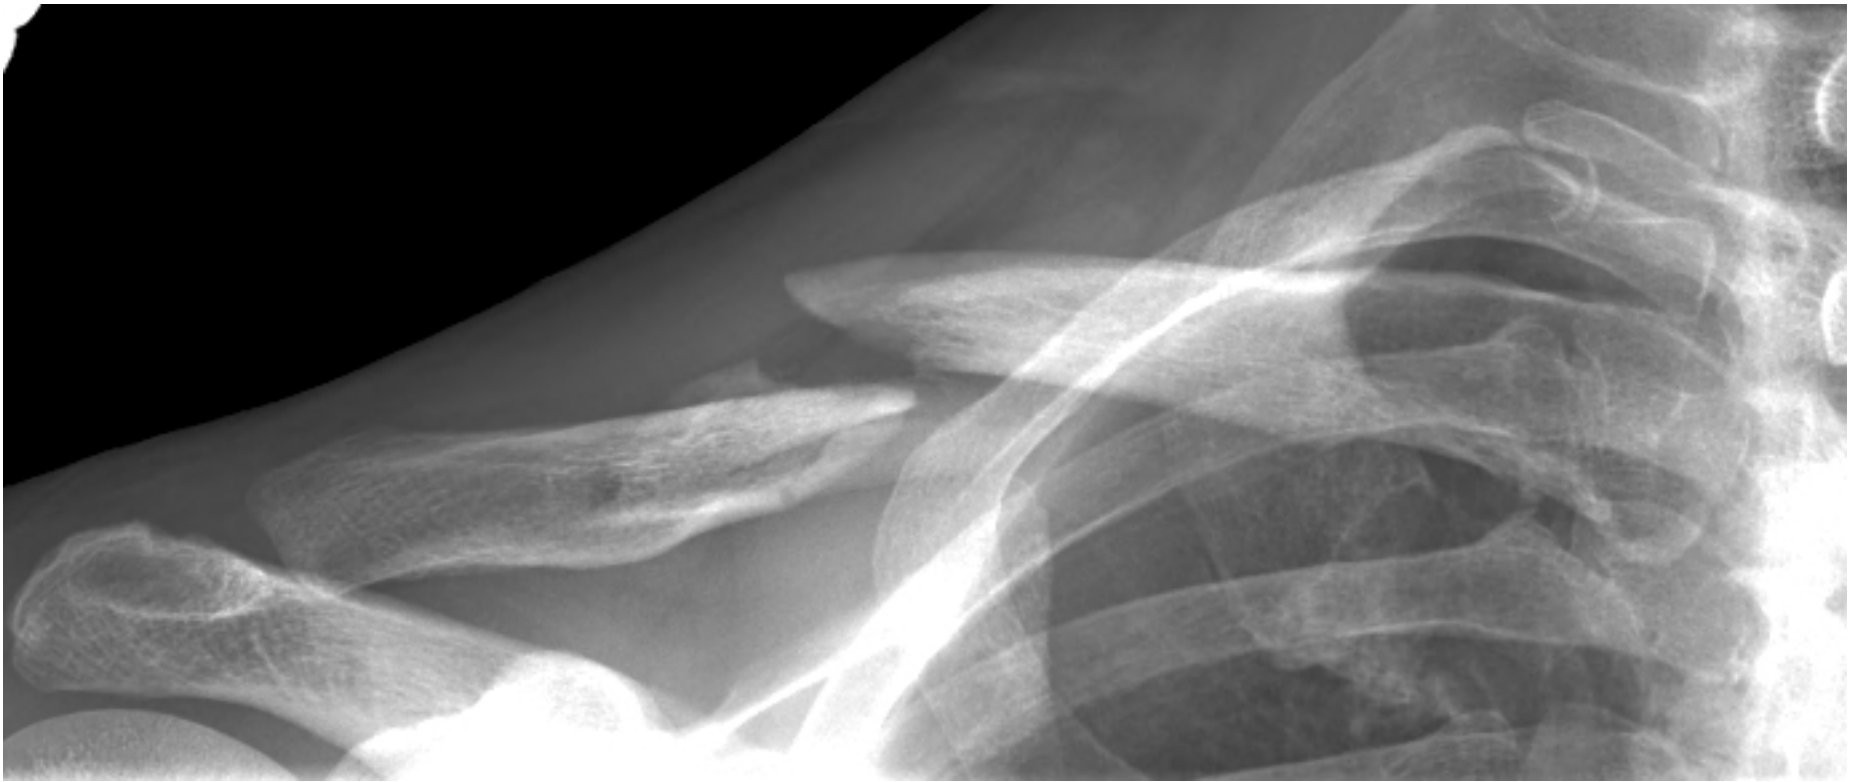

## 2. Displaced lateral clavicle fracture 1

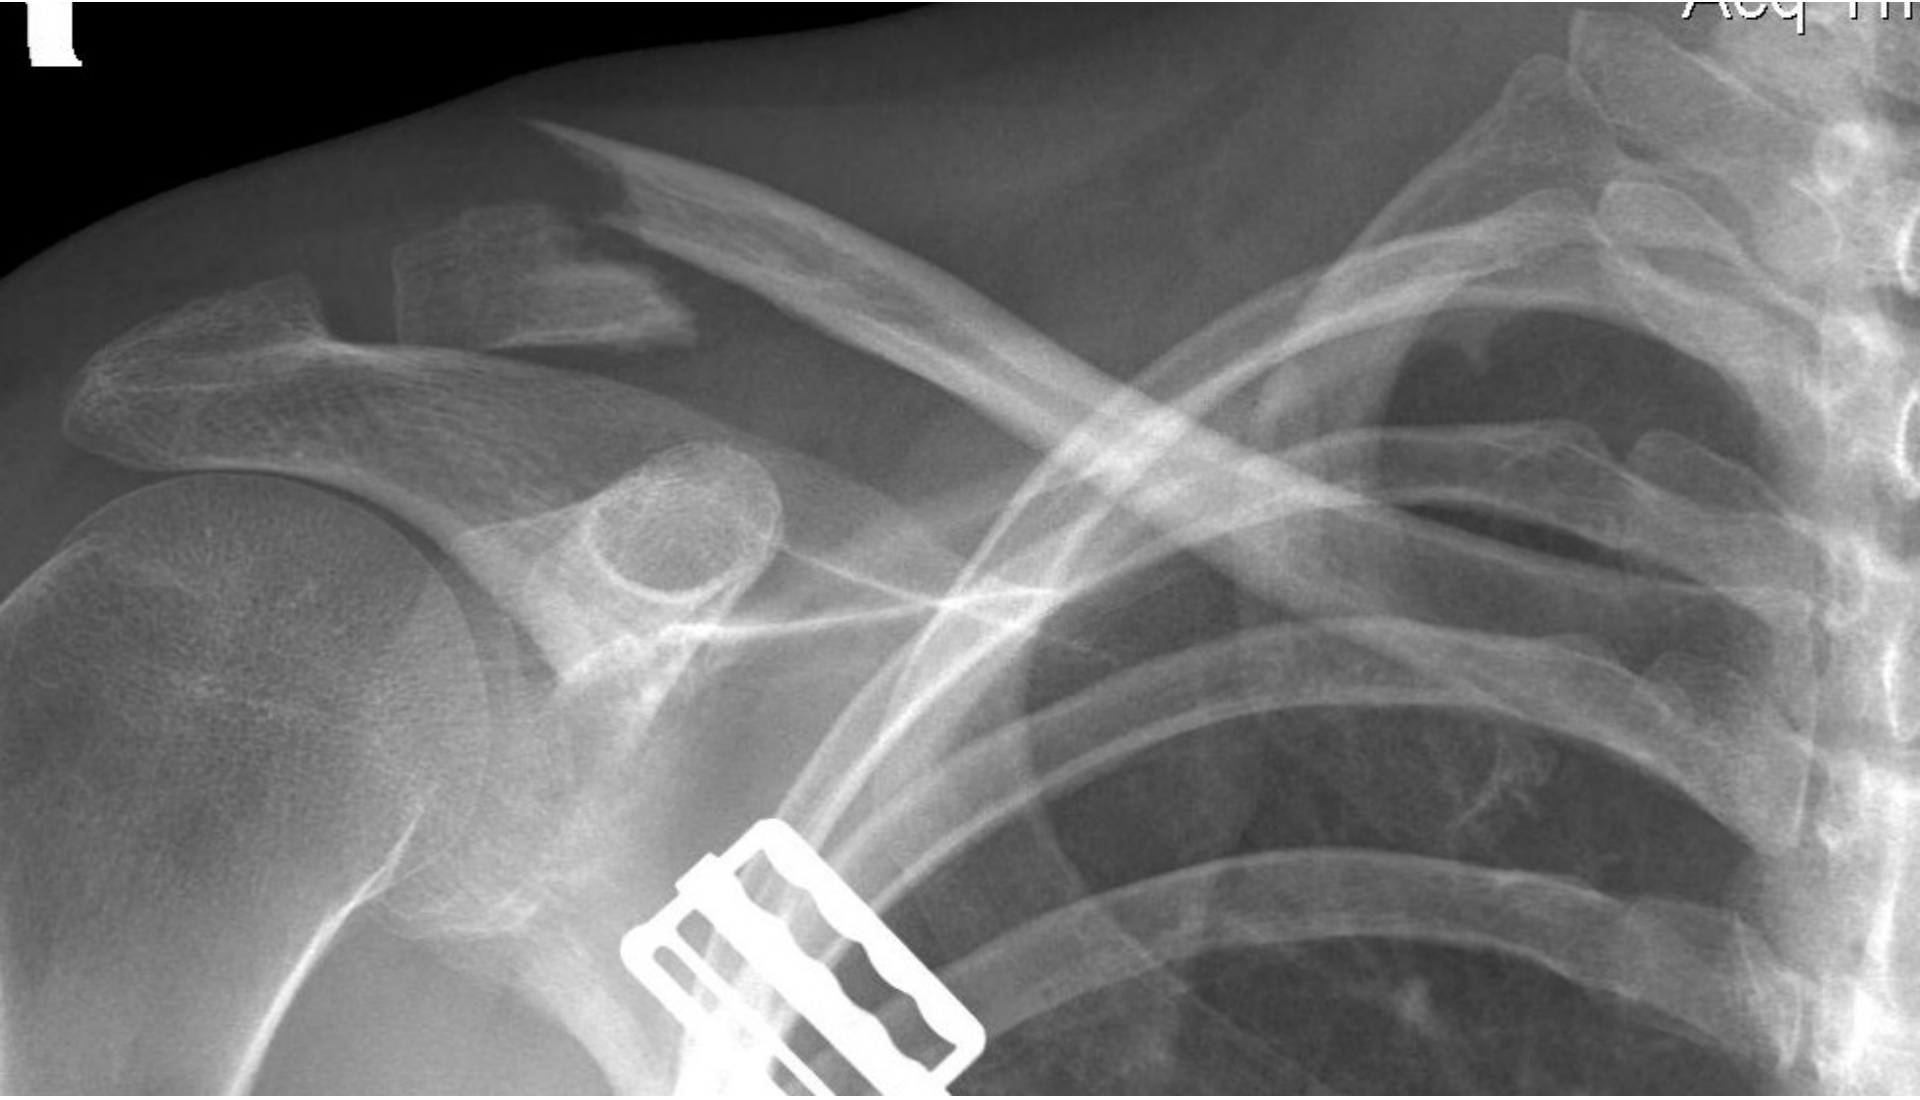

## 2. Displaced lateral clavicle fracture 2

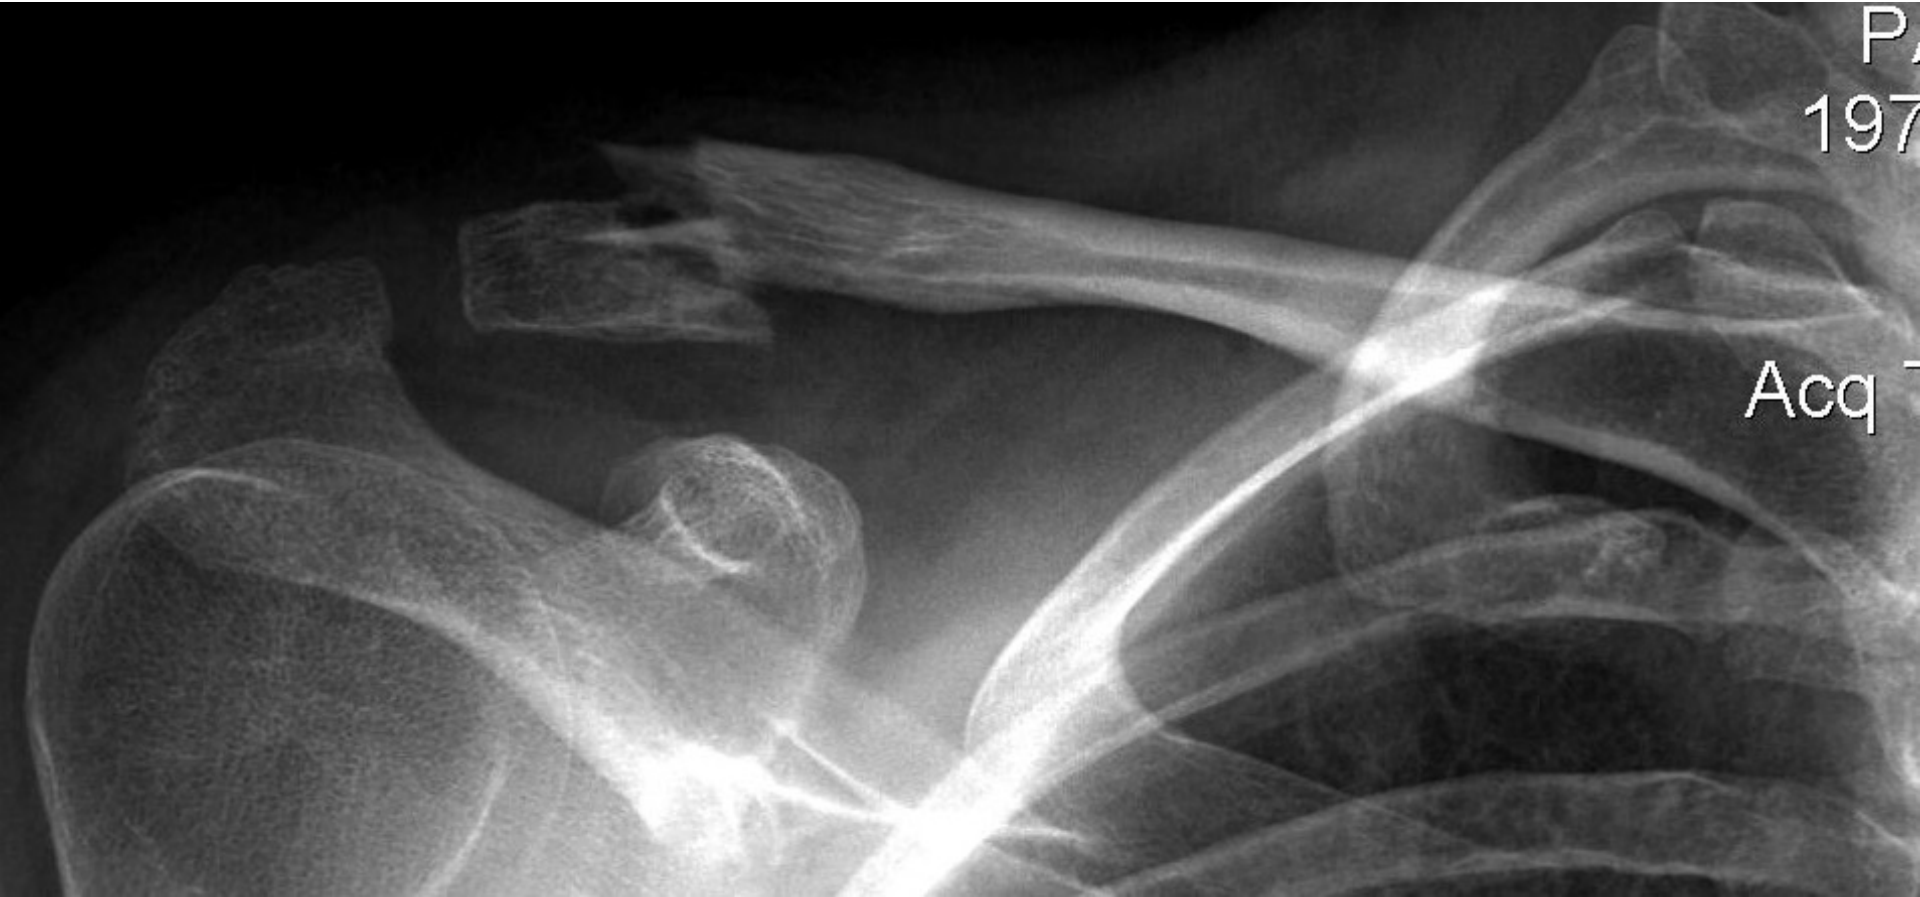

### 3. Displaced acromioclavicular joint dislocation 1

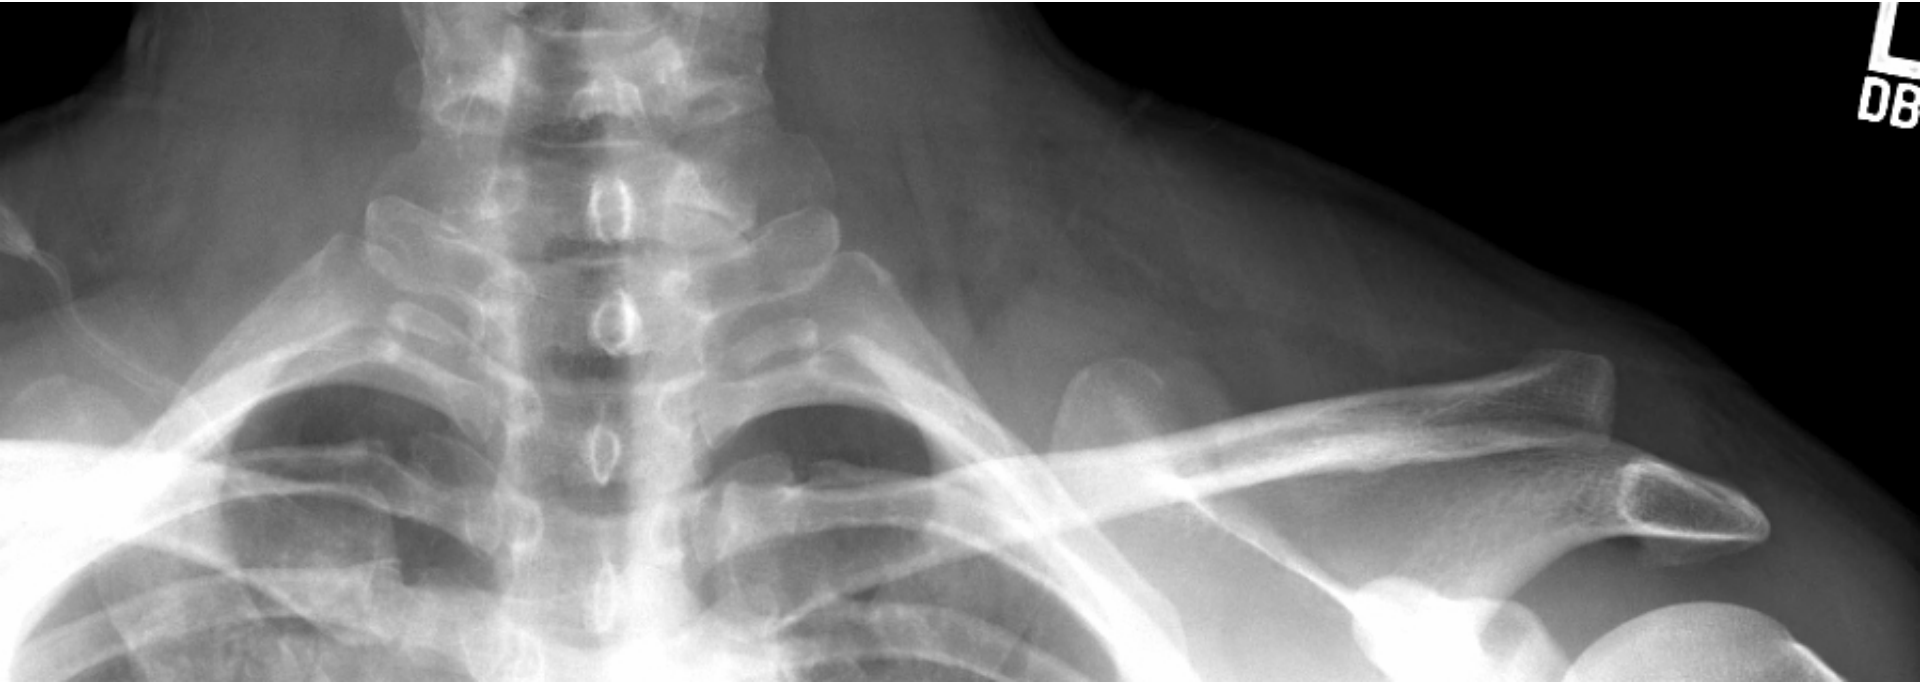

### 3. Displaced acromioclavicular joint dislocation 1

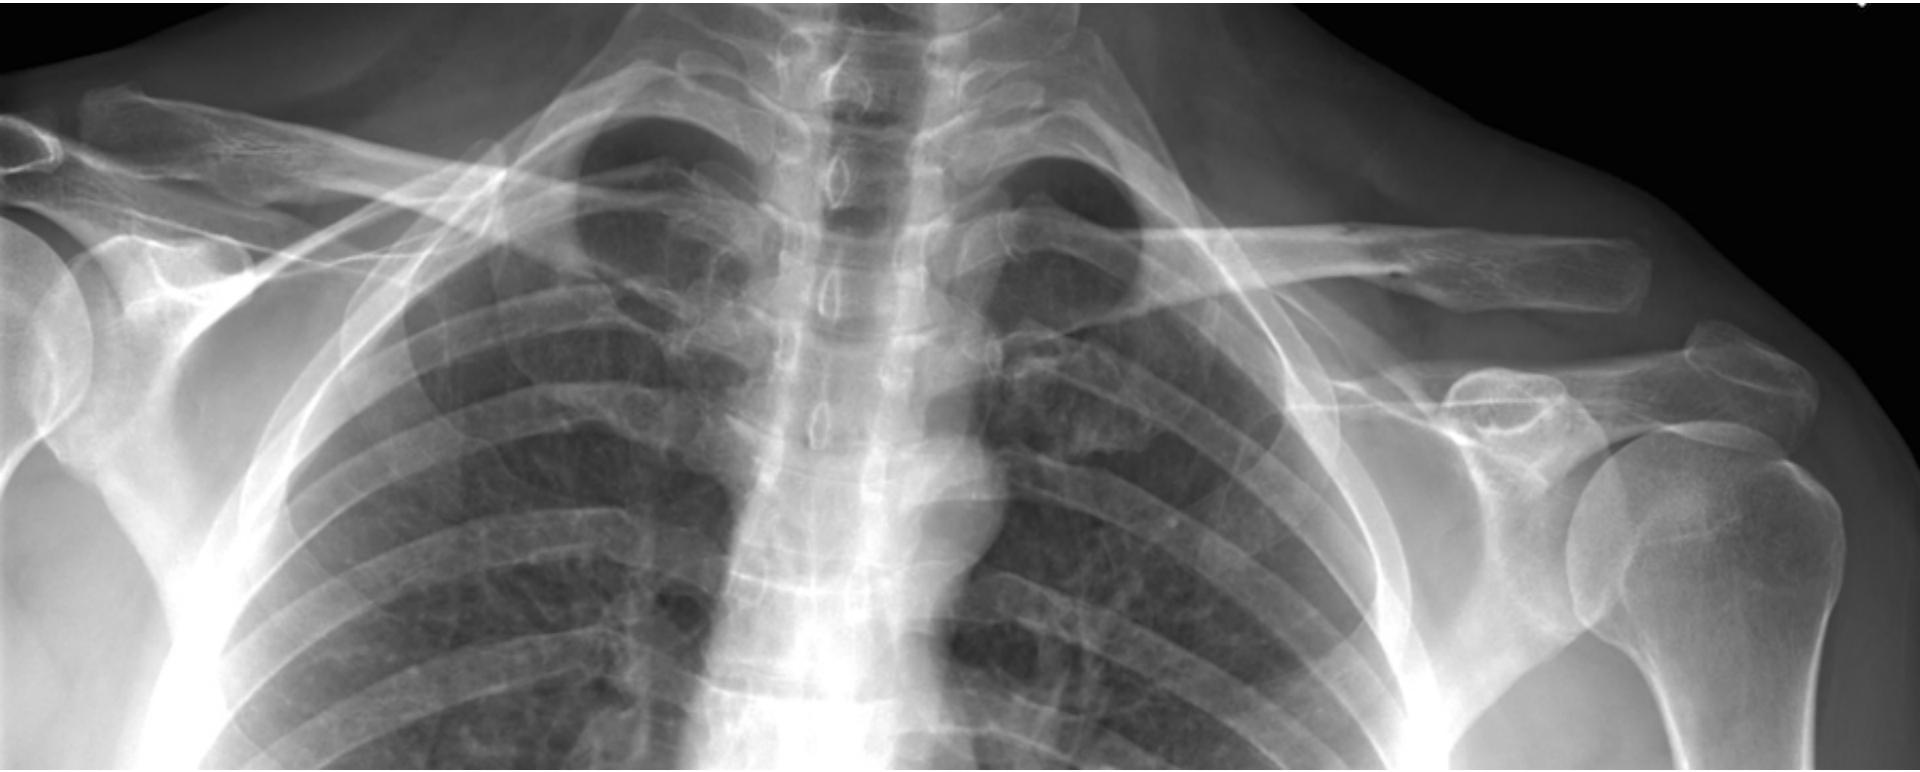

## 4. Acromion fracture 1

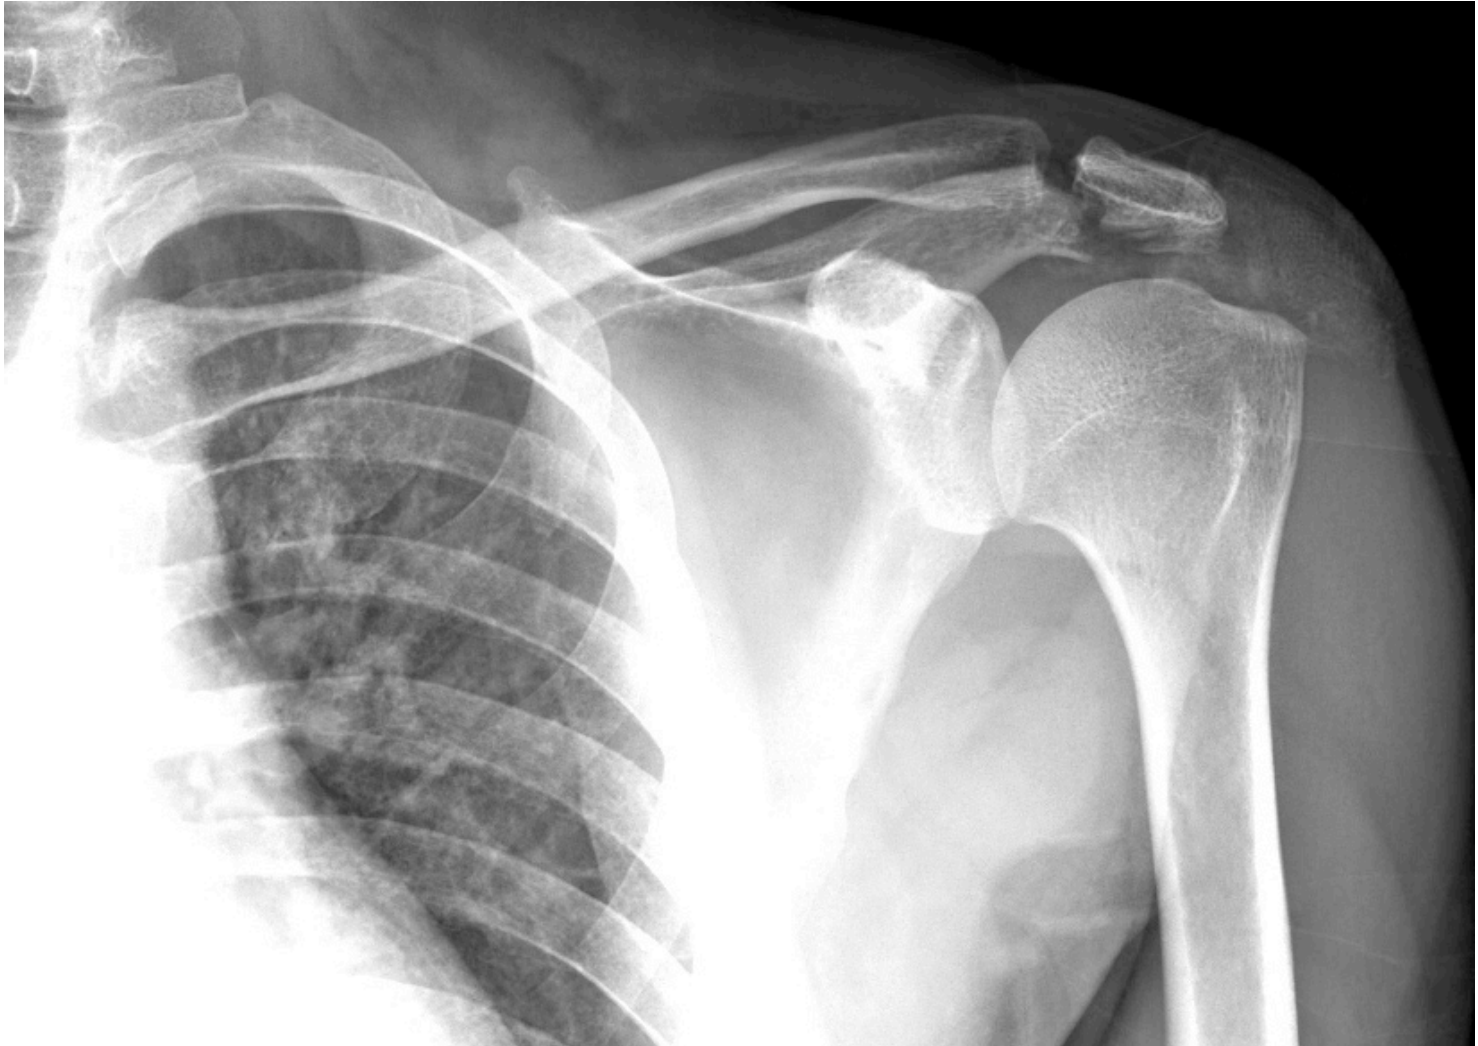



# 4. Acromion fracture 2

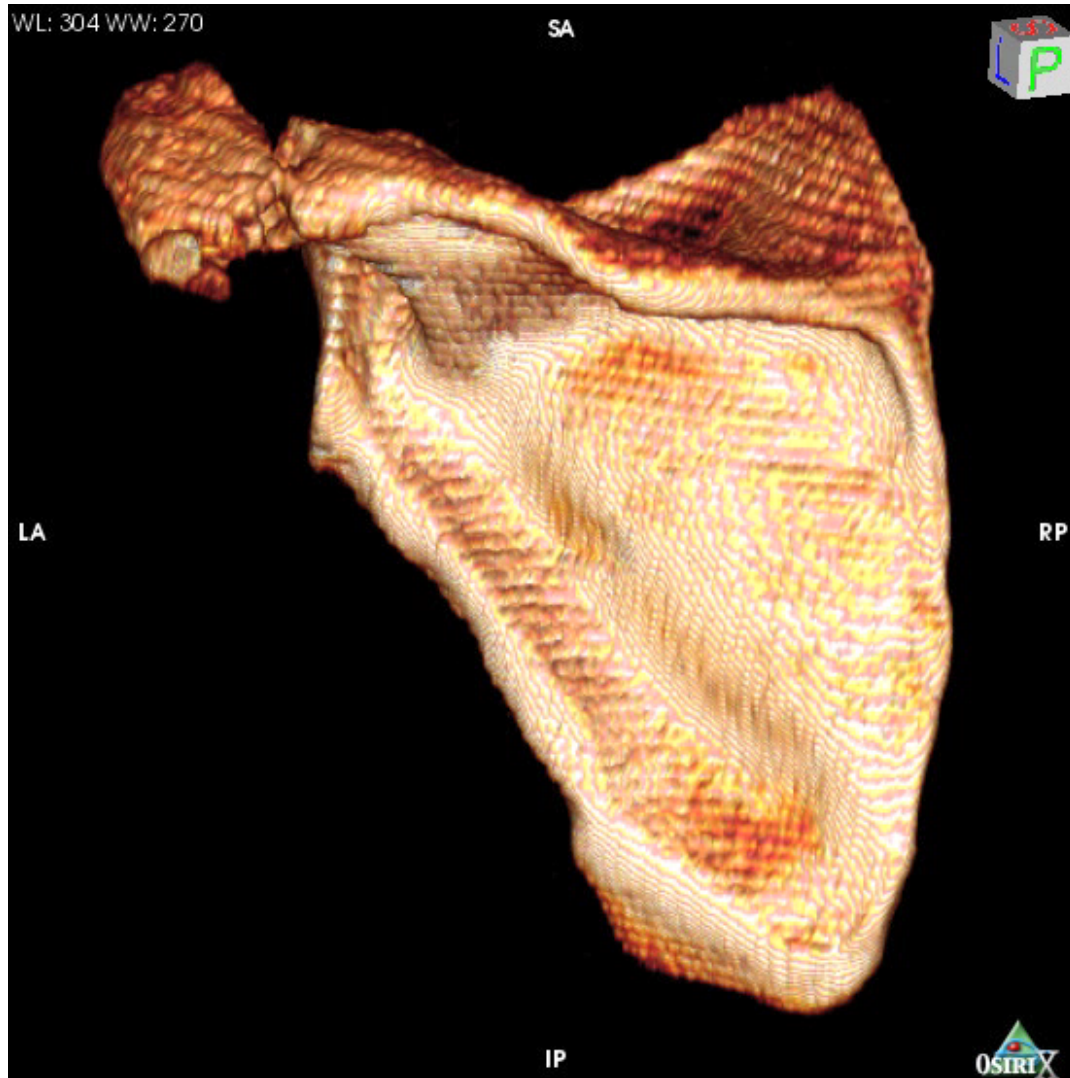

# 5. Coracoid fracture 1

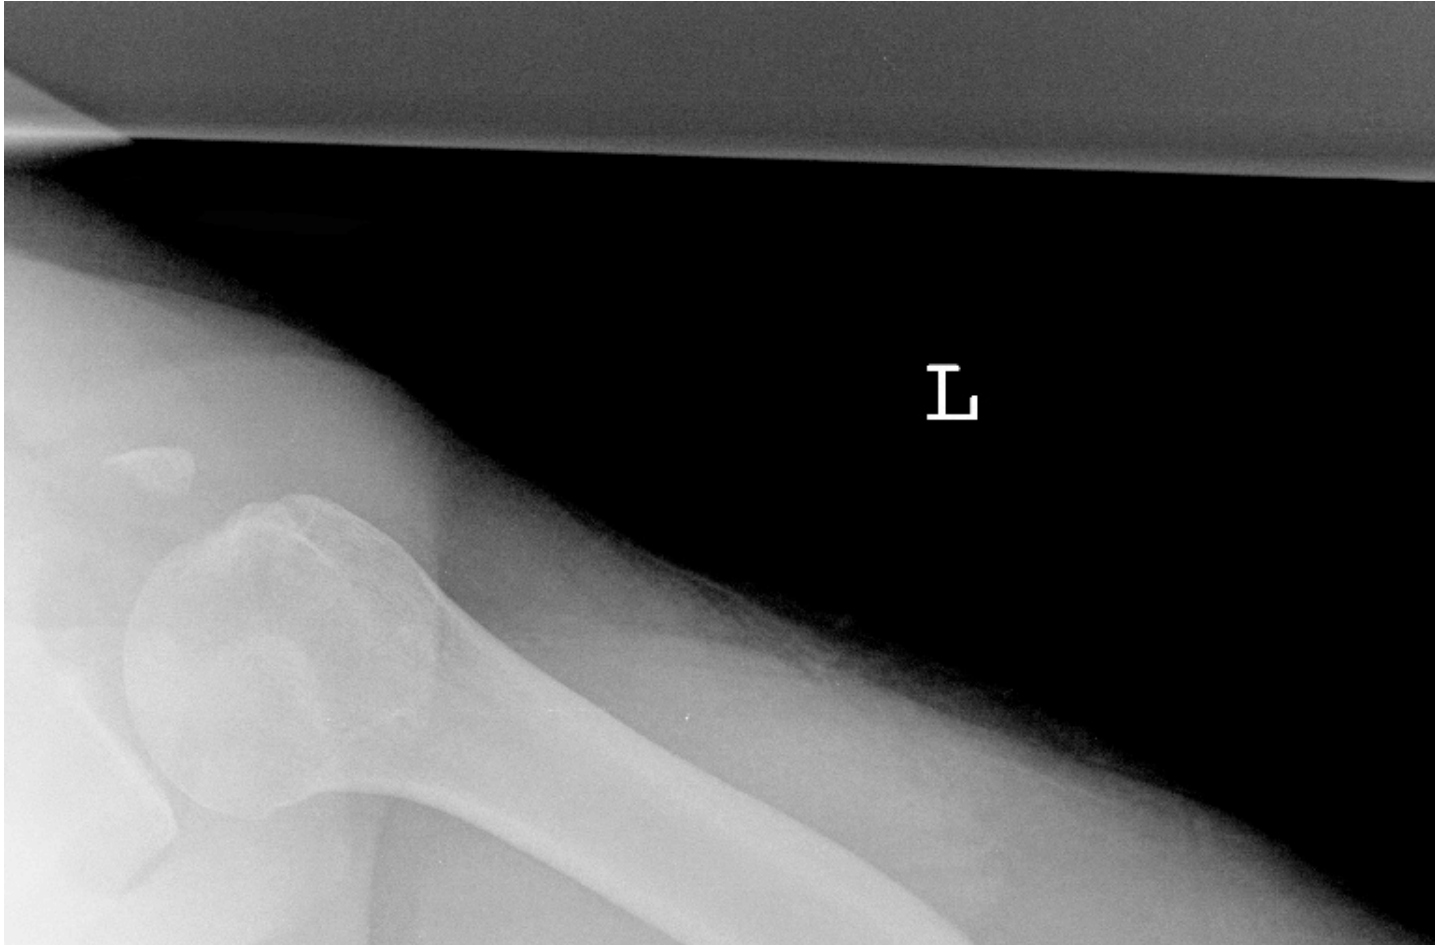

# 5. Coracoid fracture 2

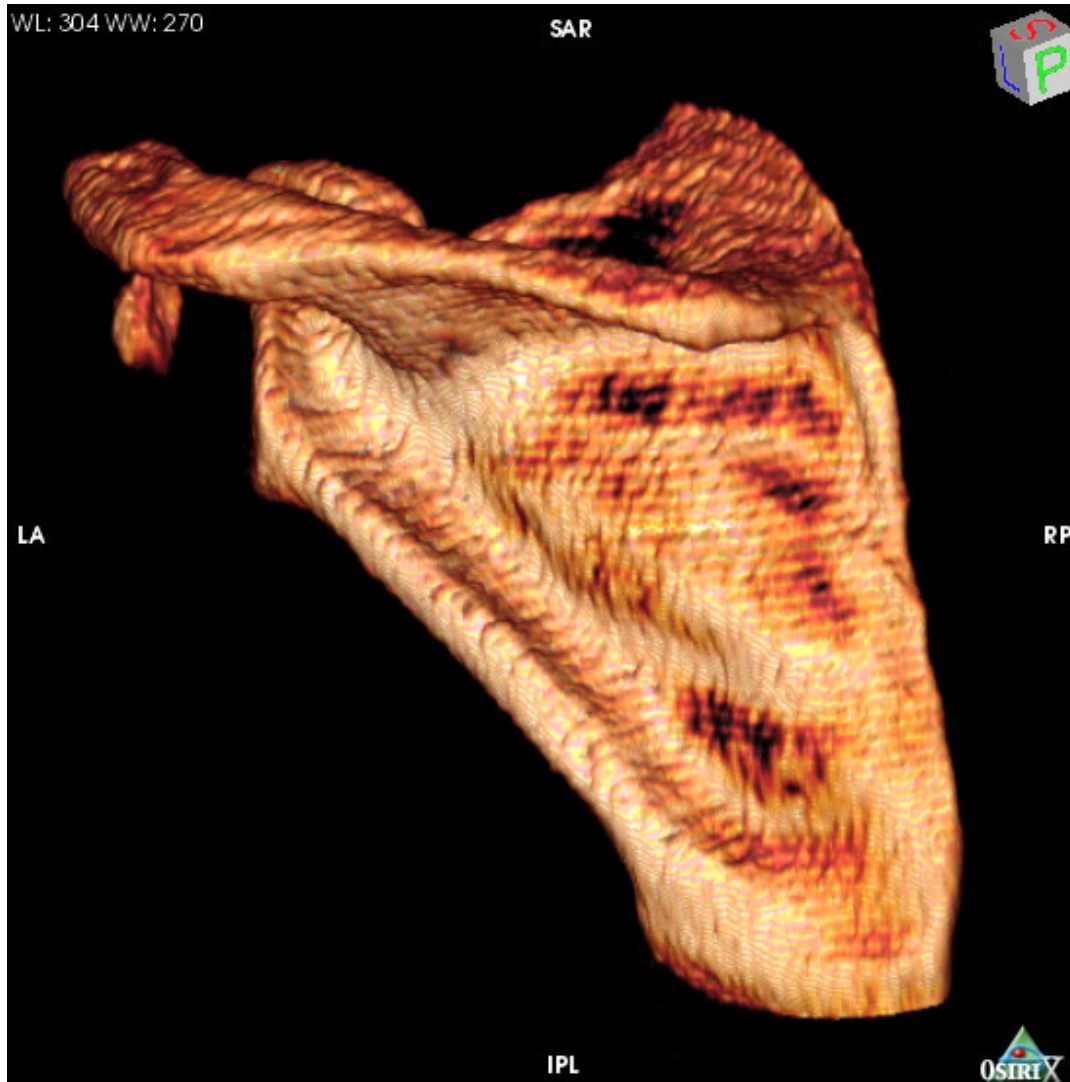

## 6. Glenoid fracture 1

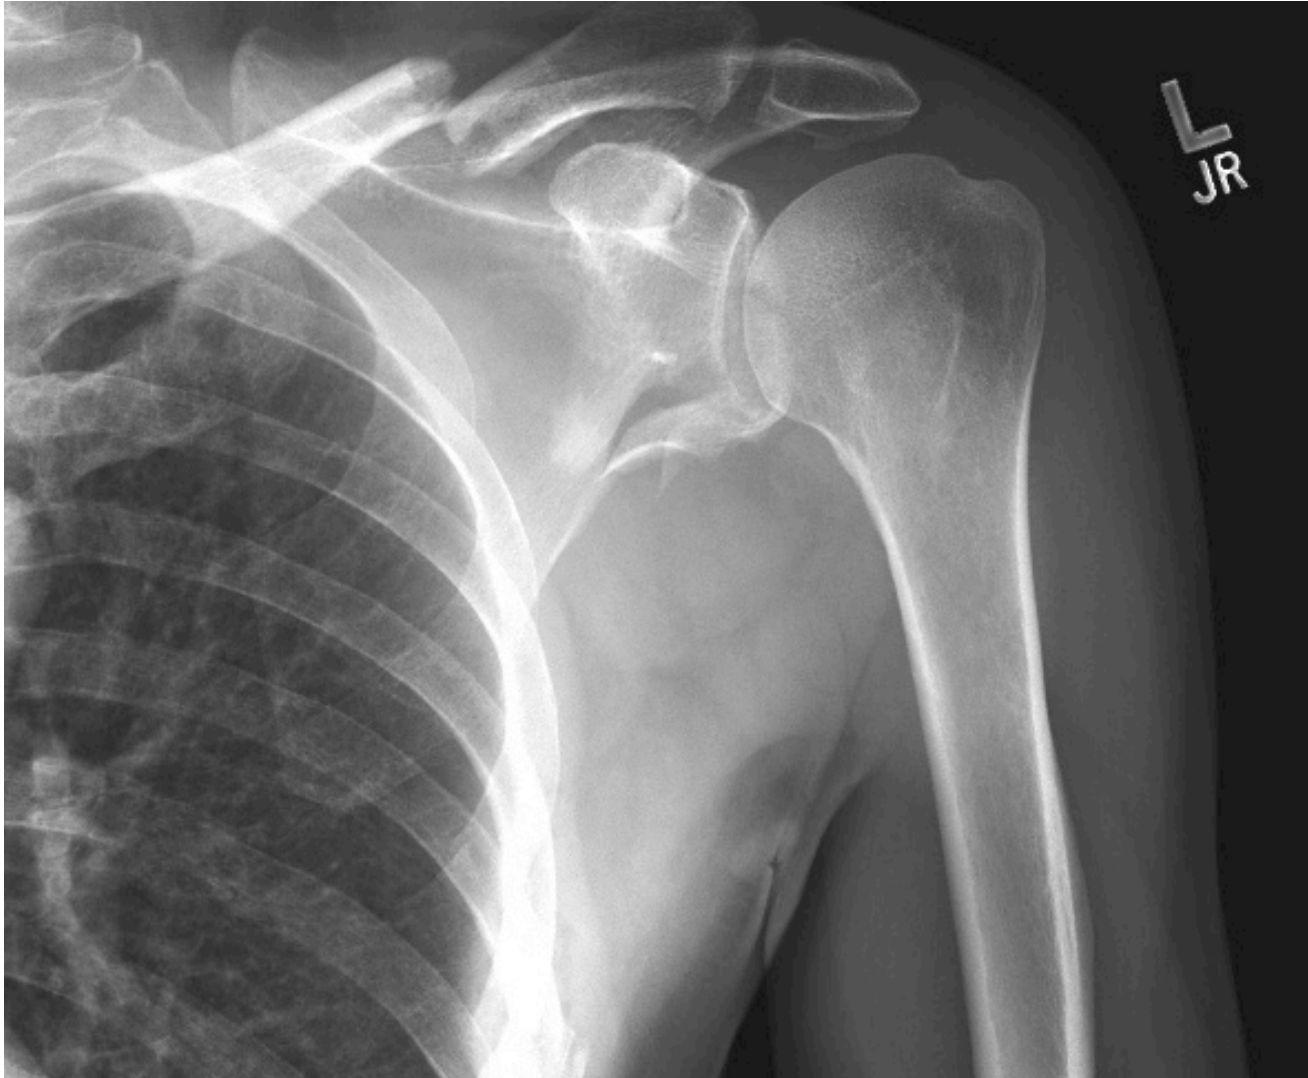

# 6. Glenoid fracture 2

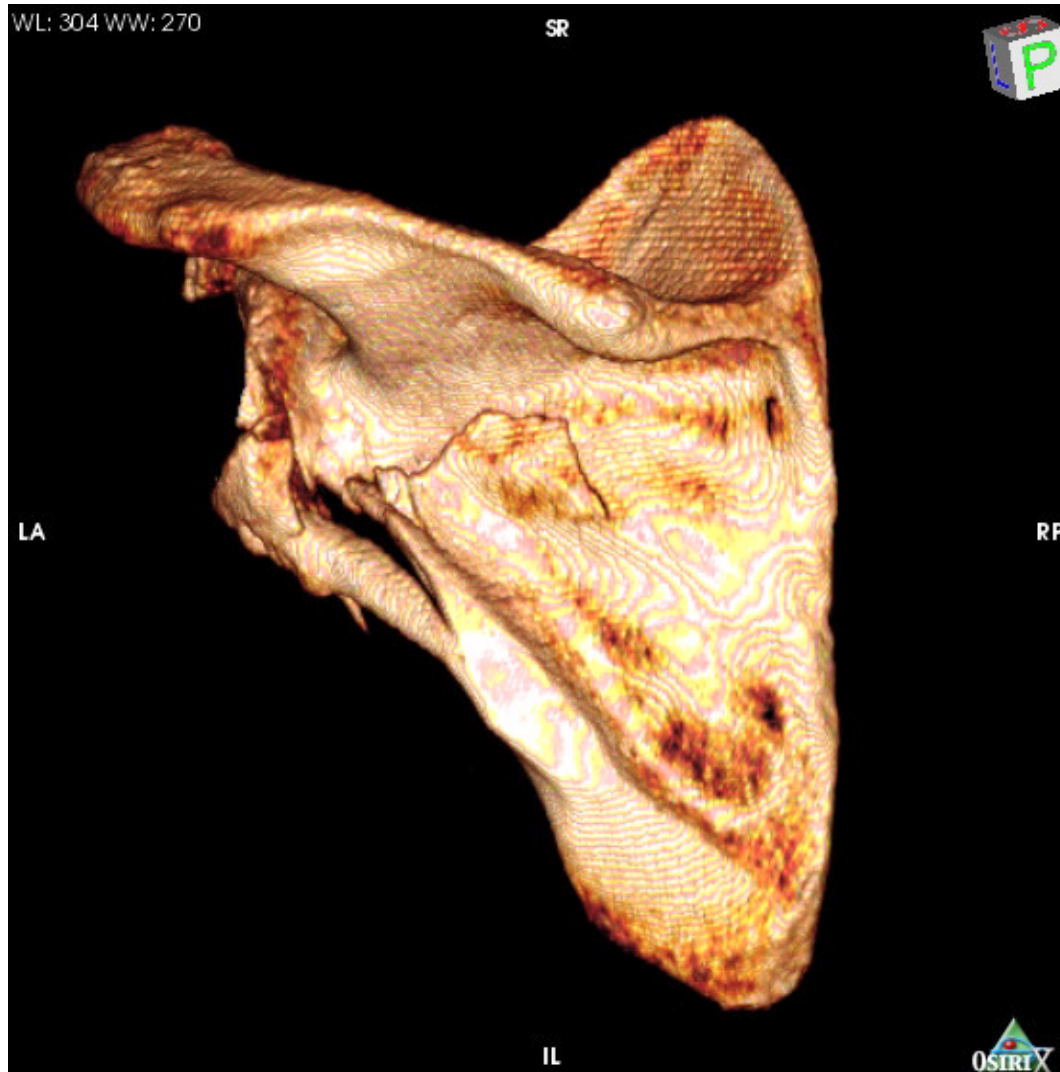

# 7. Proximal humerus surgical neck fracture 1

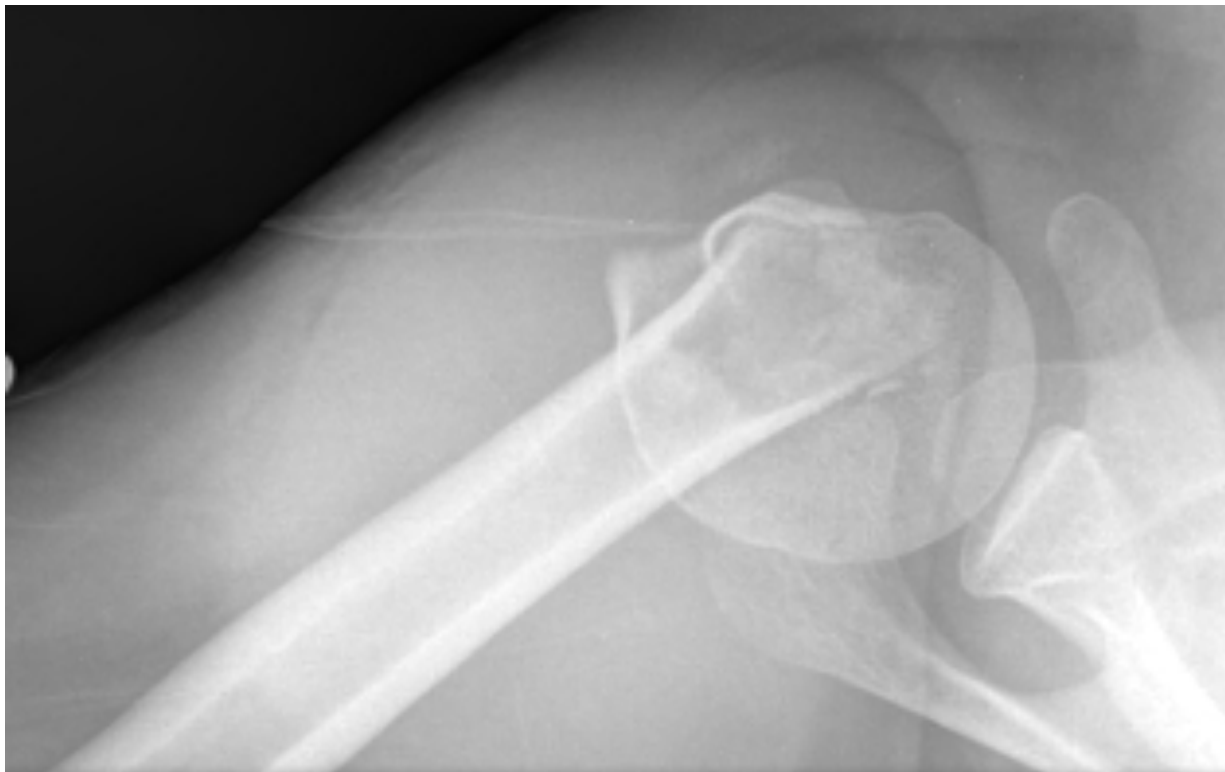

# 7. Proximal humerus surgical neck fracture 2

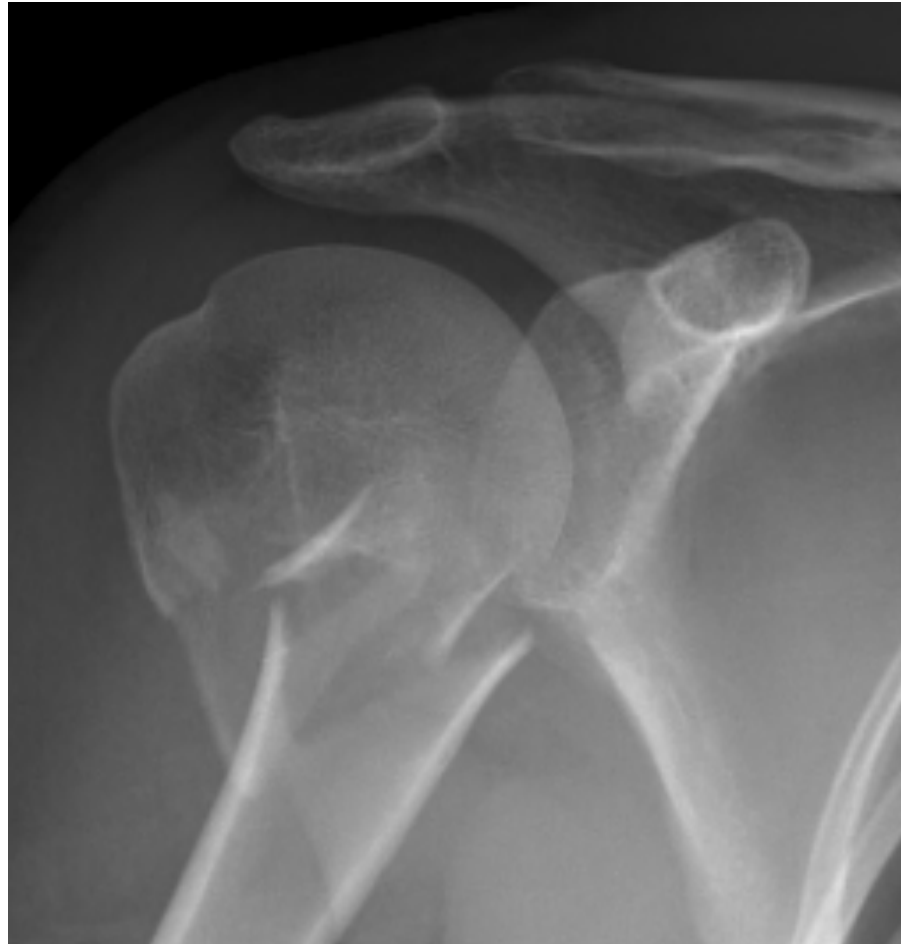

## 8. Proximal humerus greater tuberosity fracture 1

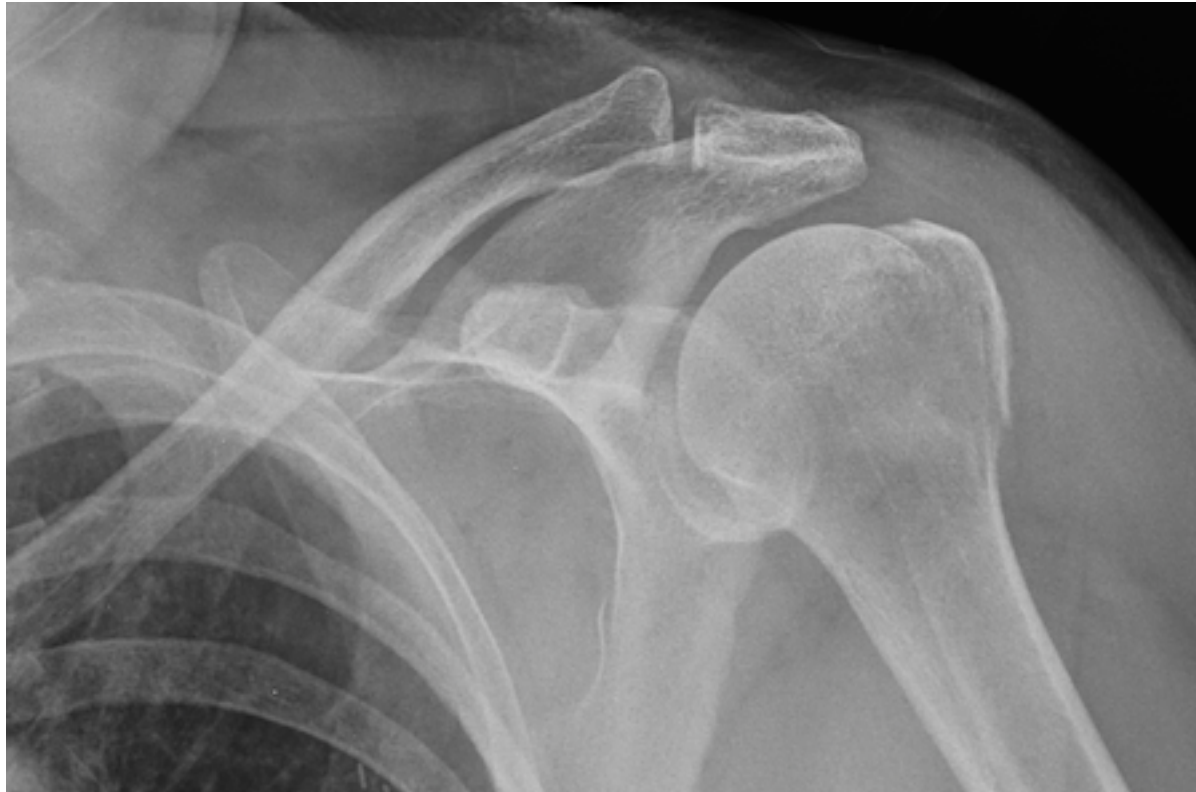



# 8. Proximal humerus greater tuberosity fracture 2

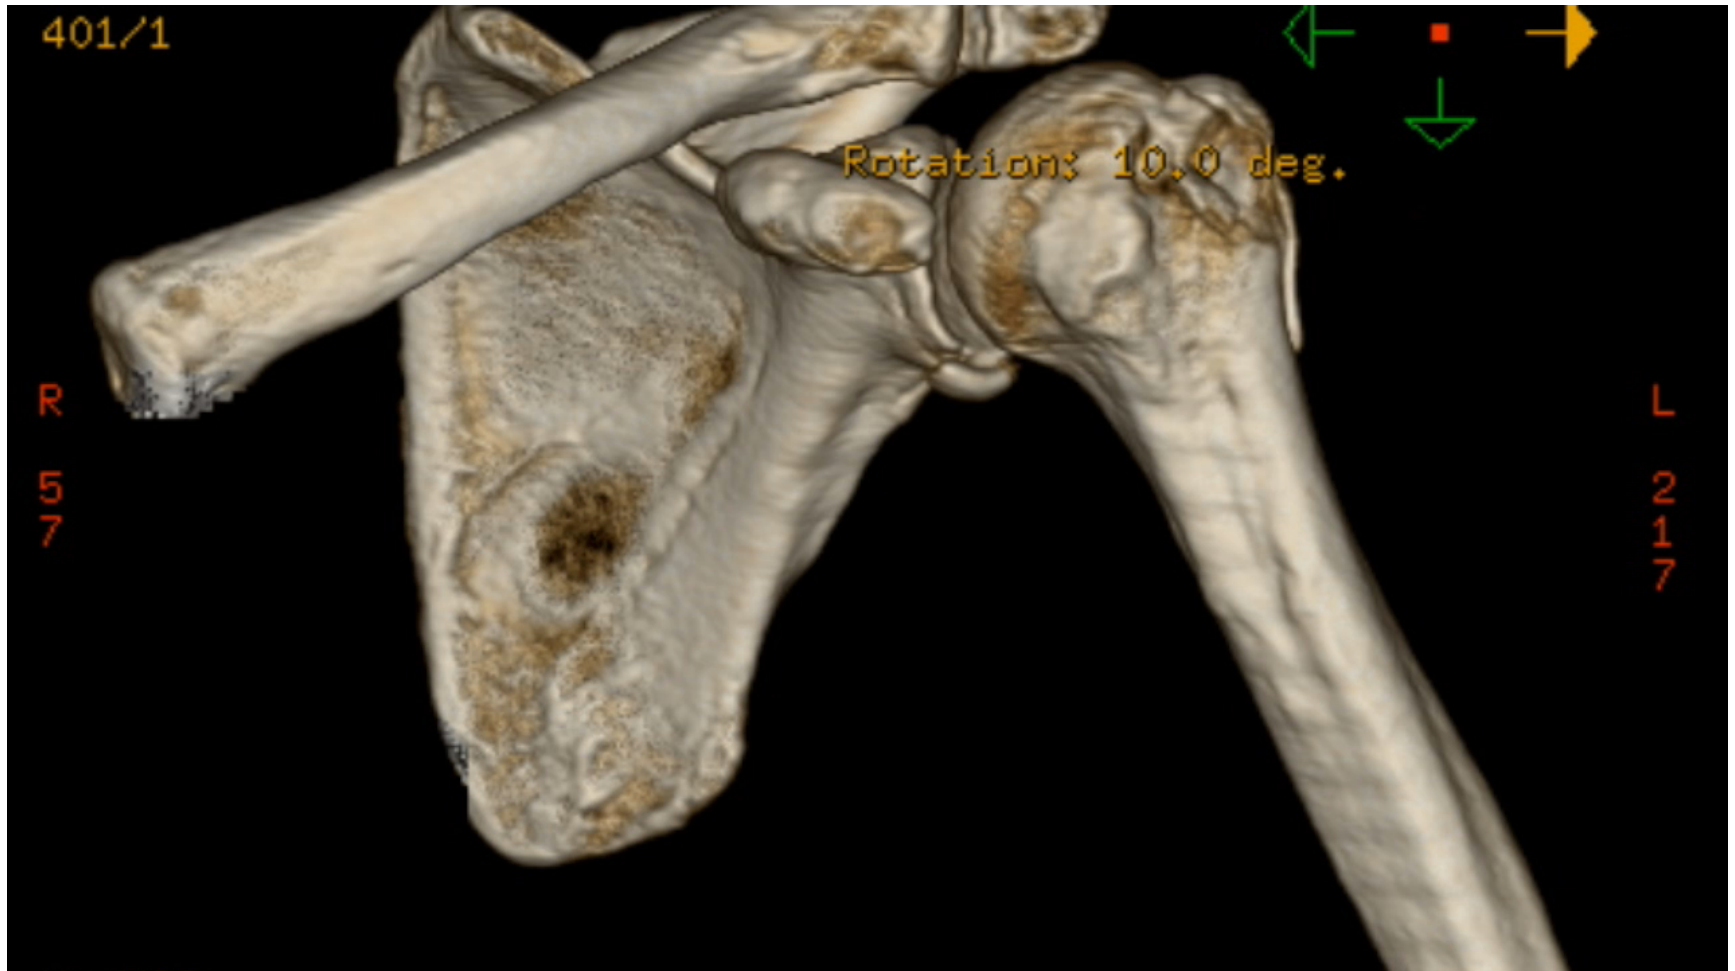

# 9. Proximal humerus valgus impacted fracture 1

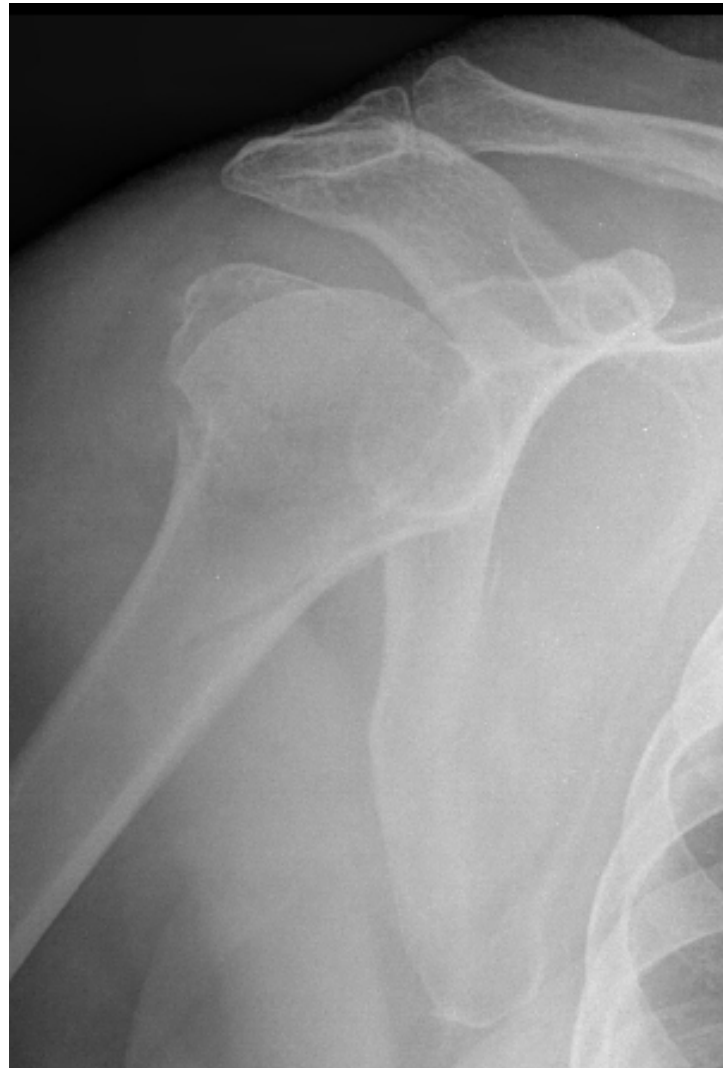

# 9. Proximal humerus valgus impacted fracture 2

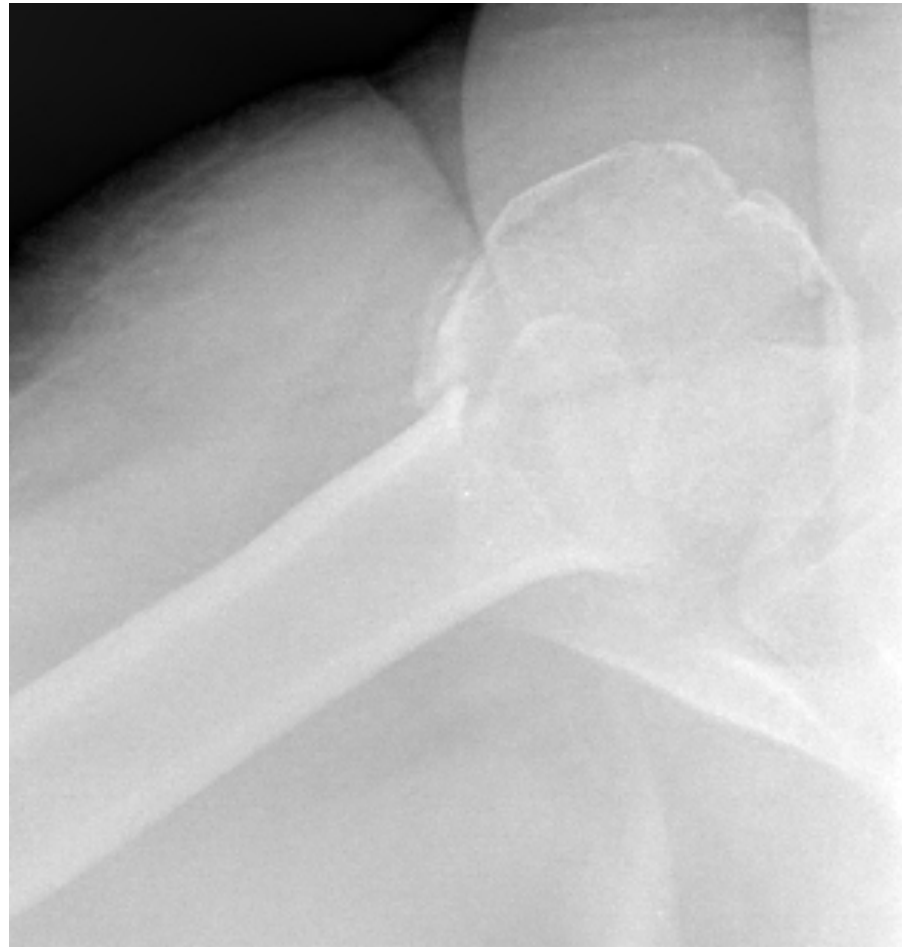

# 10. Proximal diaphyseal humerus fracture 1

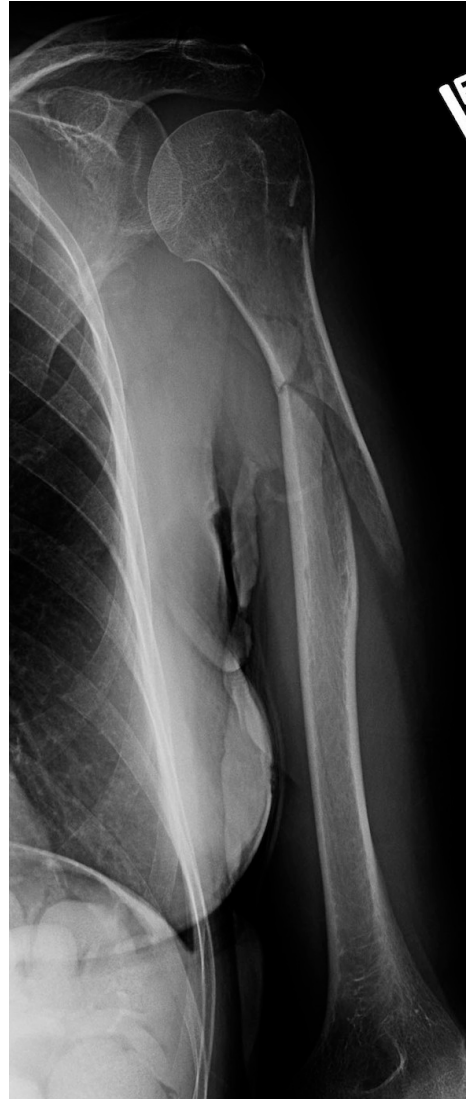

# 10. Proximal diaphyseal humerus fracture 2

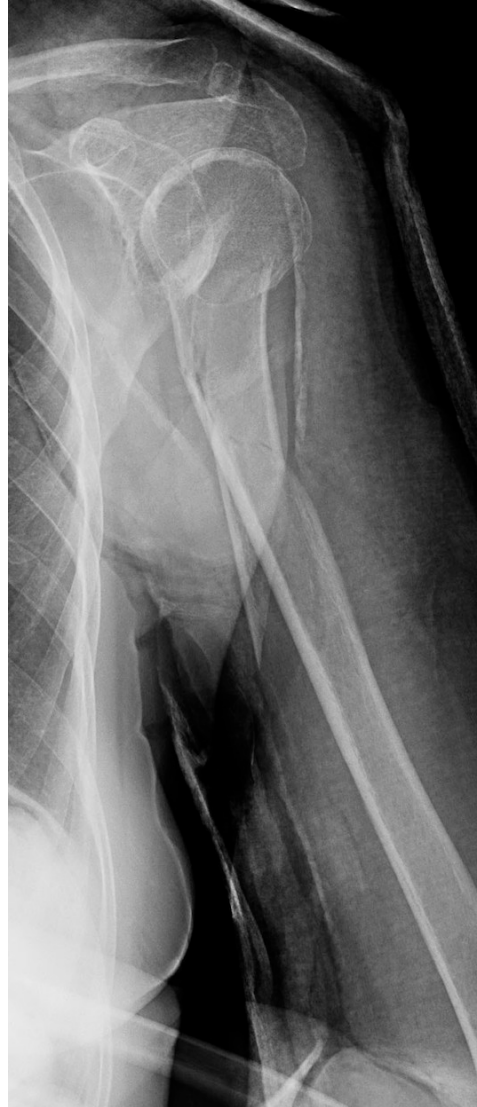

# 11. Proximal biceps rupture

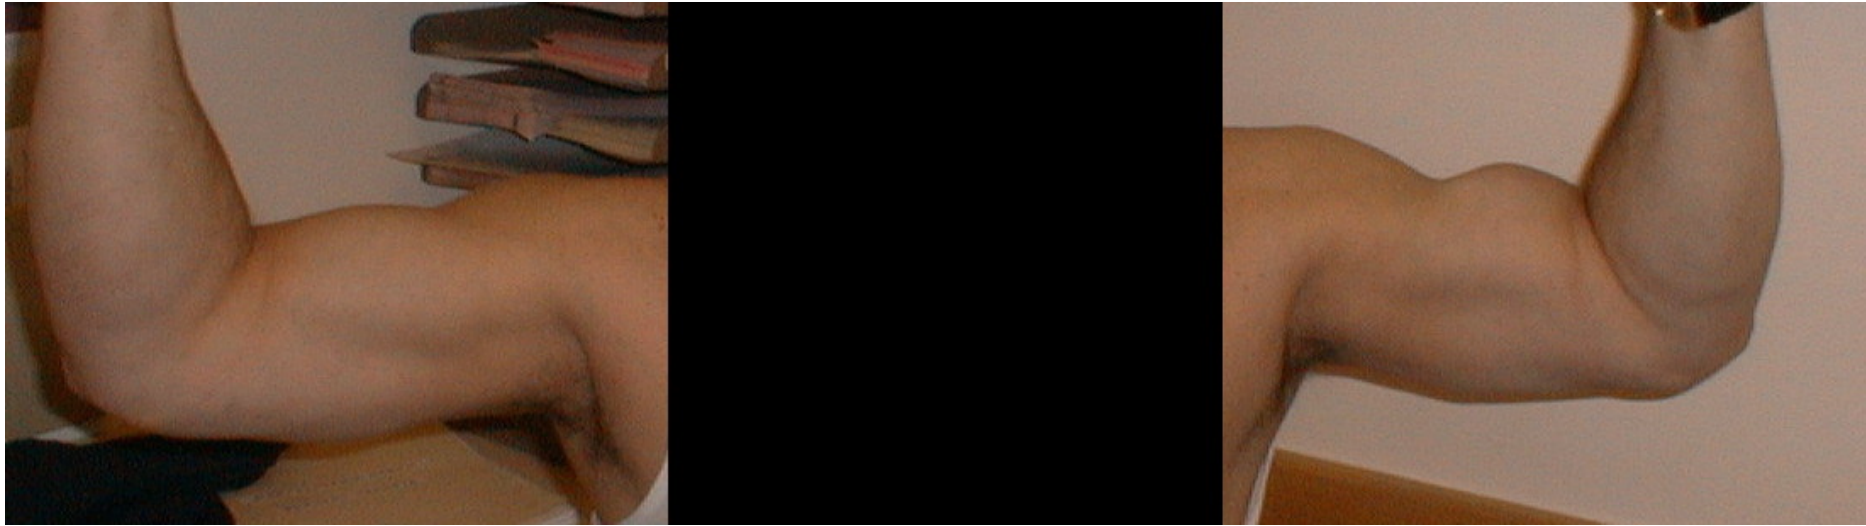

# 12. Distal diaphyseal humerus fracture

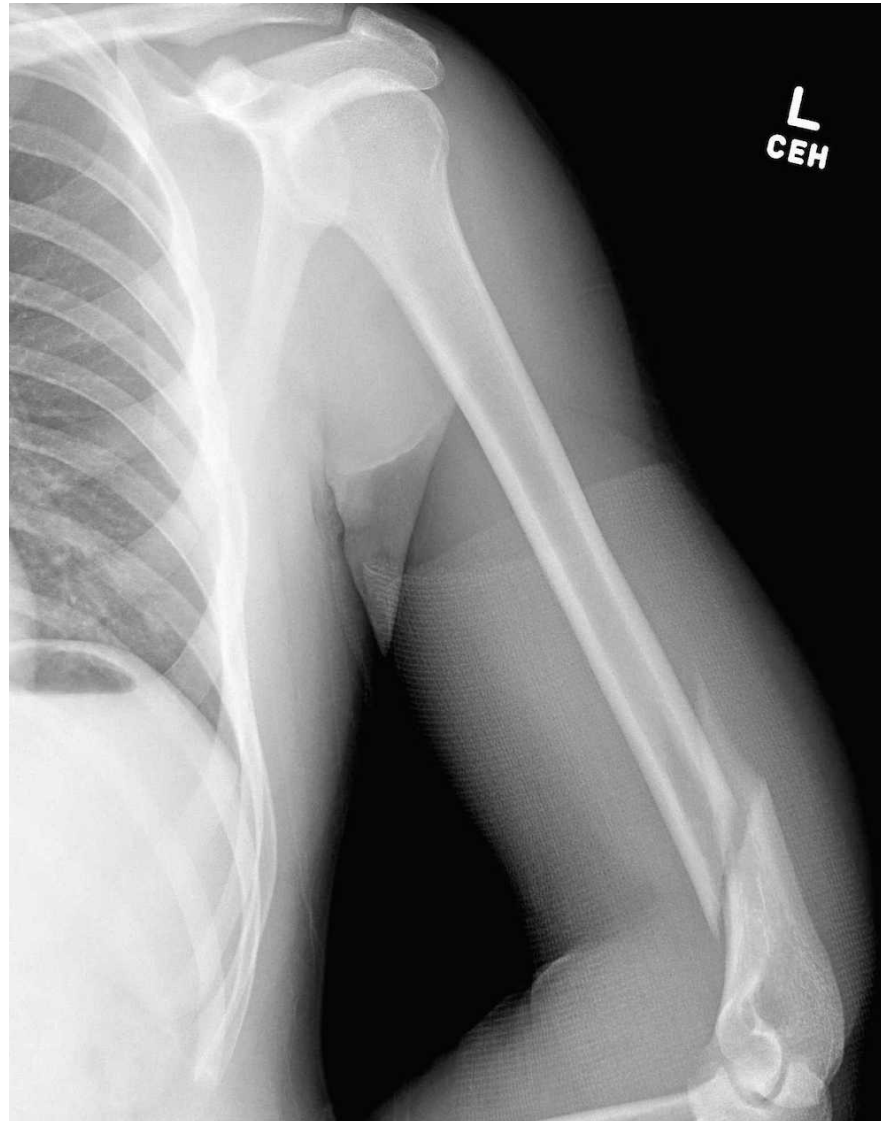

# 13. Distal Biceps rupture 1

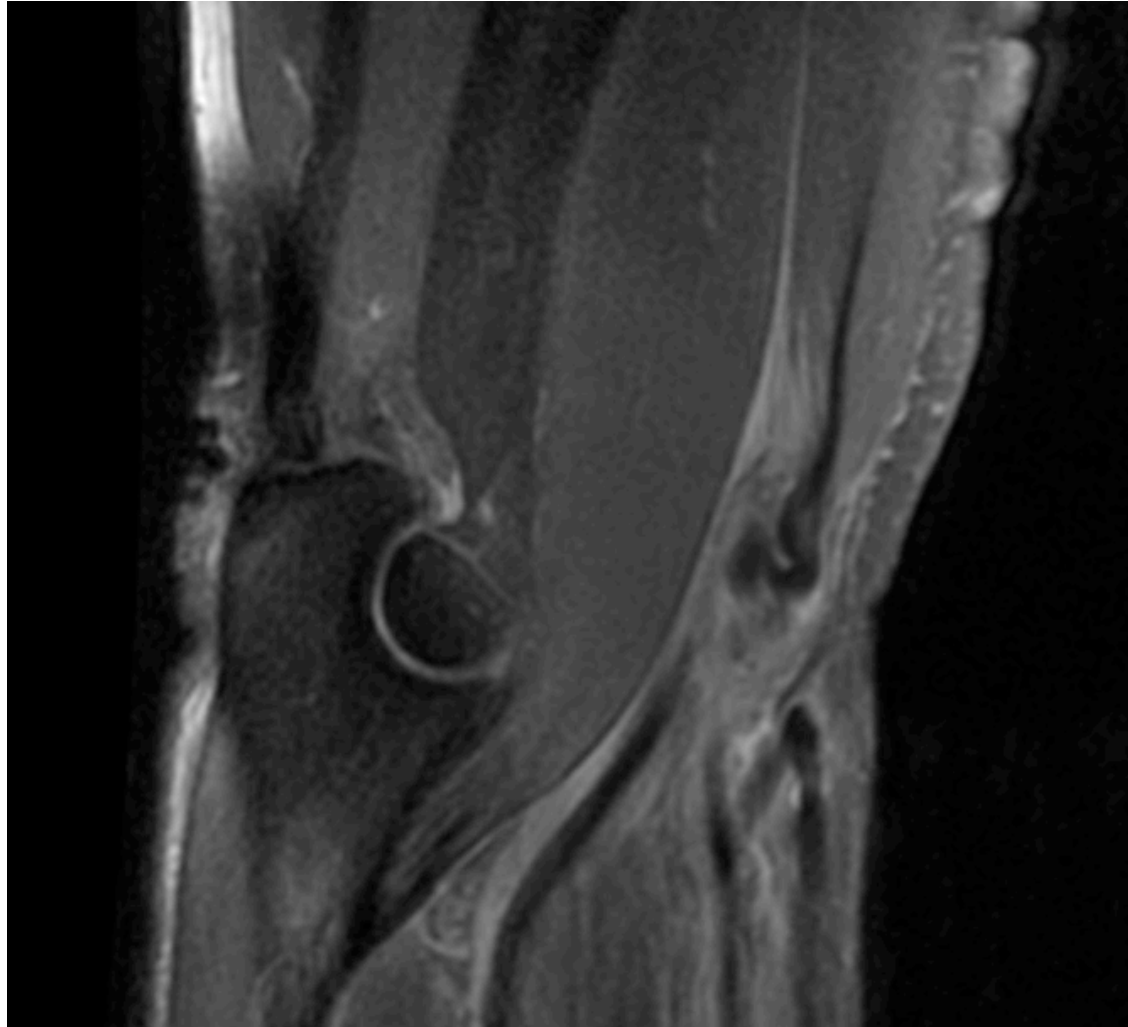



# 13. Distal Biceps rupture 2

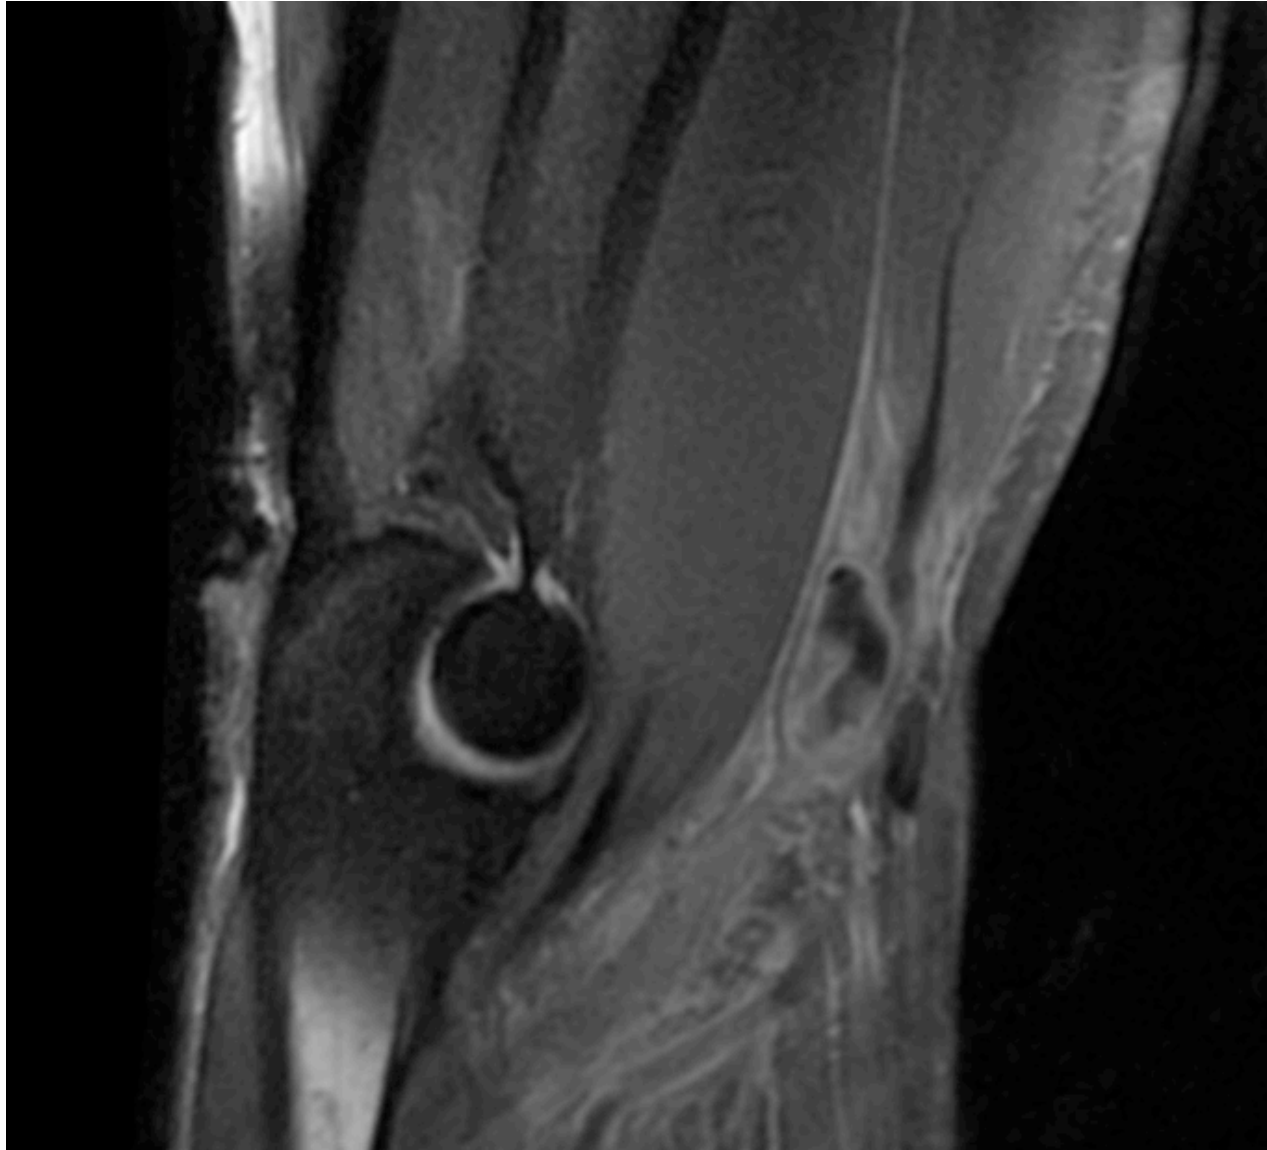

# 13. Distal Biceps rupture 3

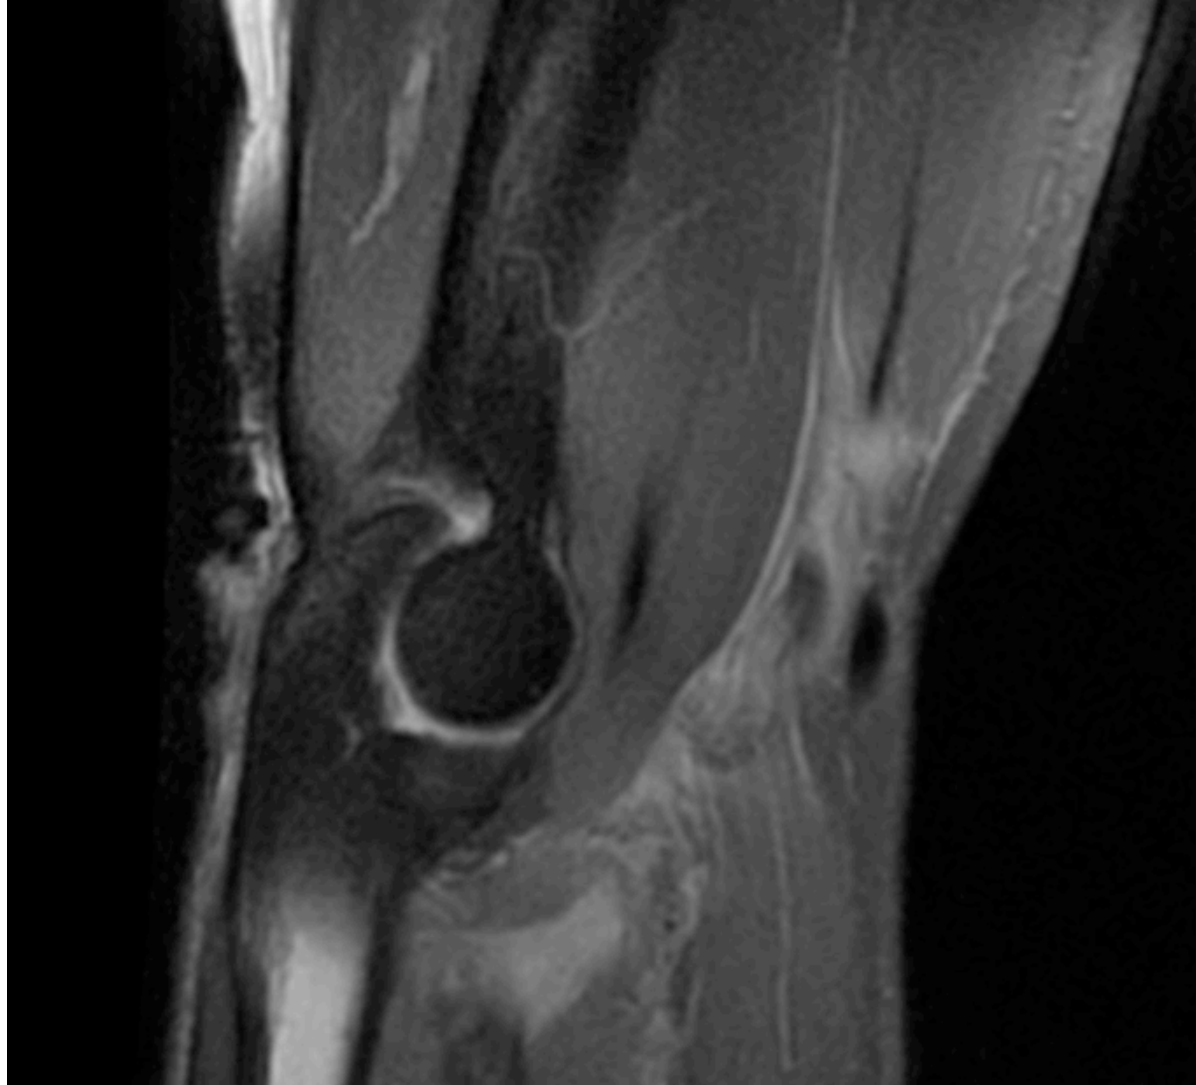

# 14. Distal radius fracture 1

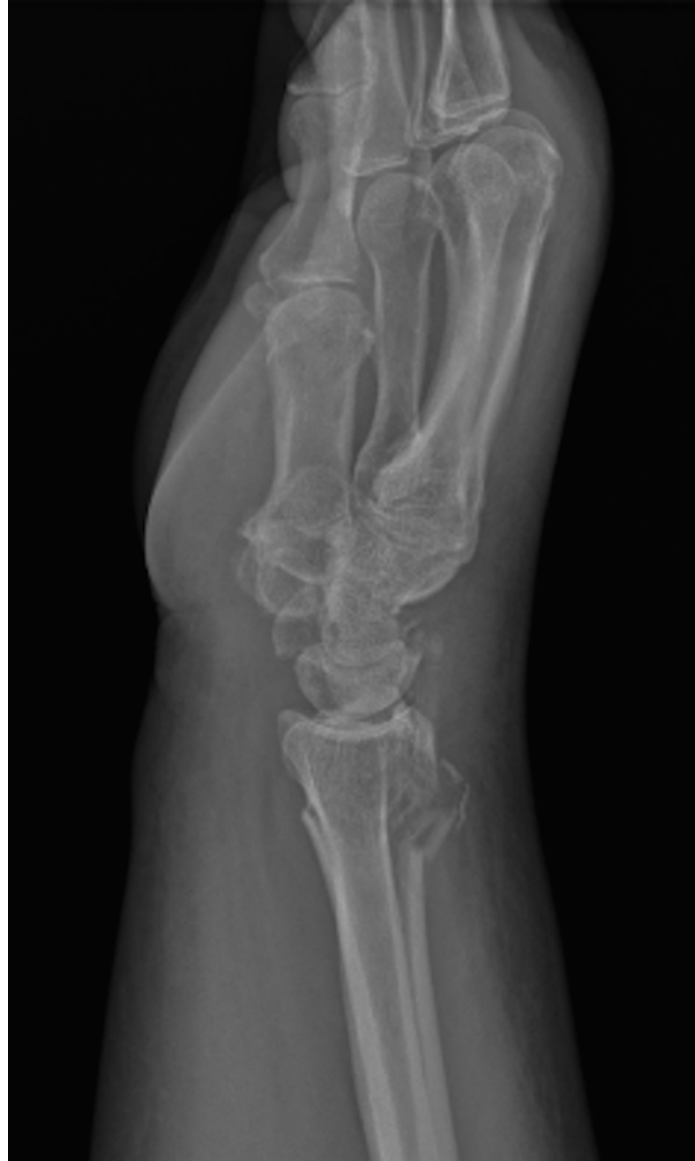

# 14. Distal radius fracture 2

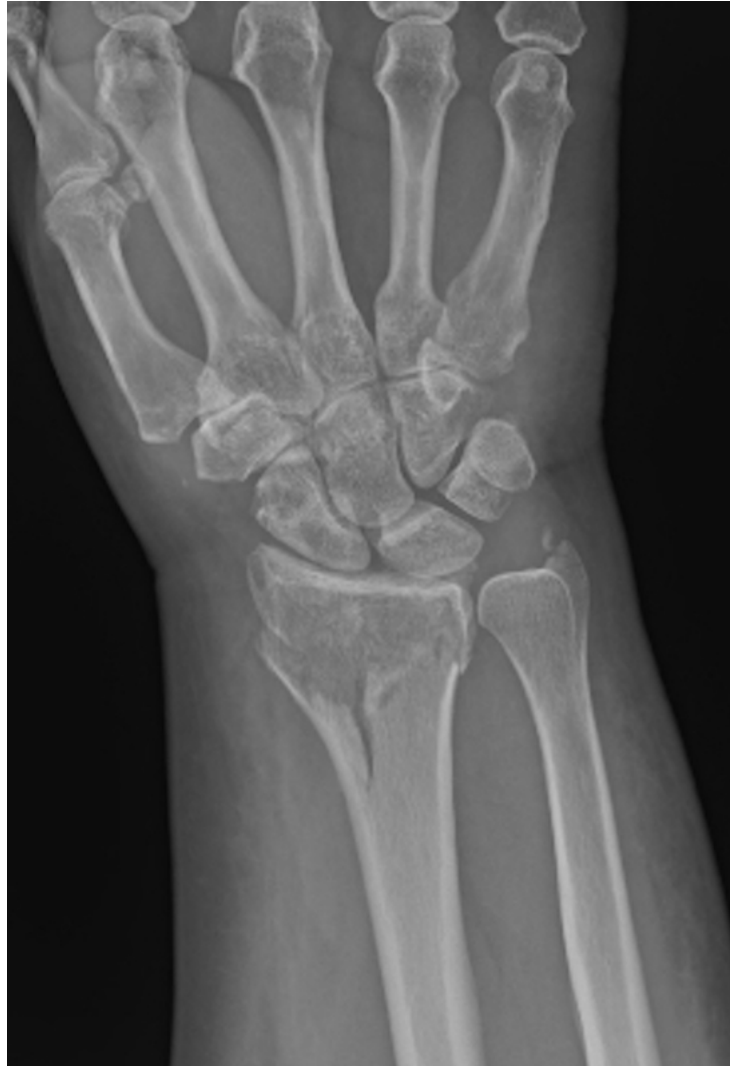

# 15. Distal radius fracture 1

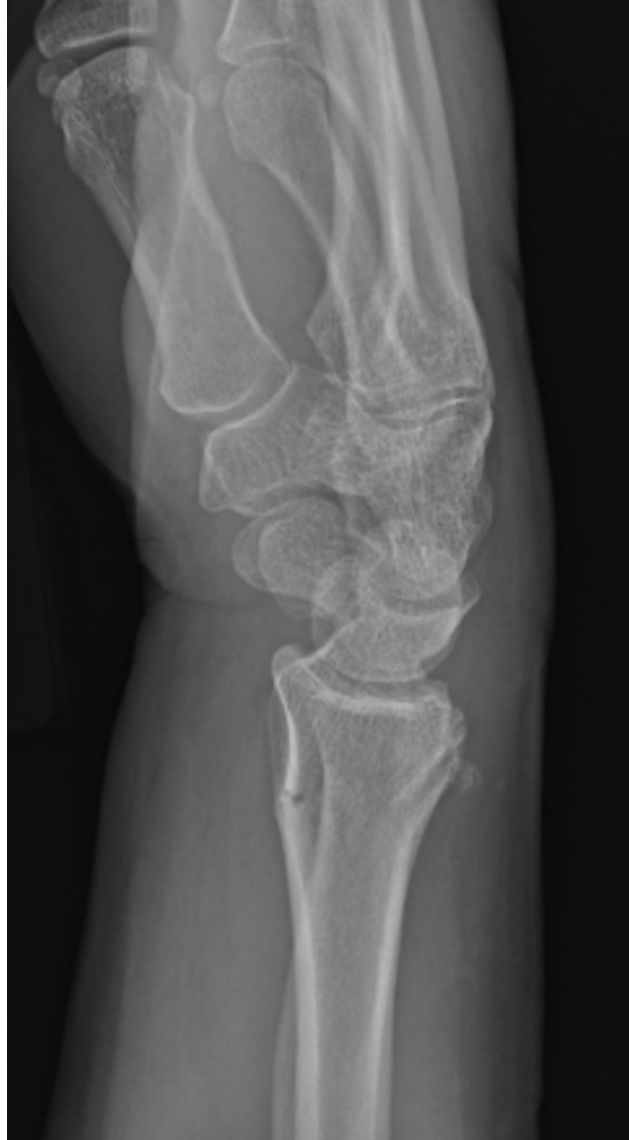

# 15. Distal radius fracture 2

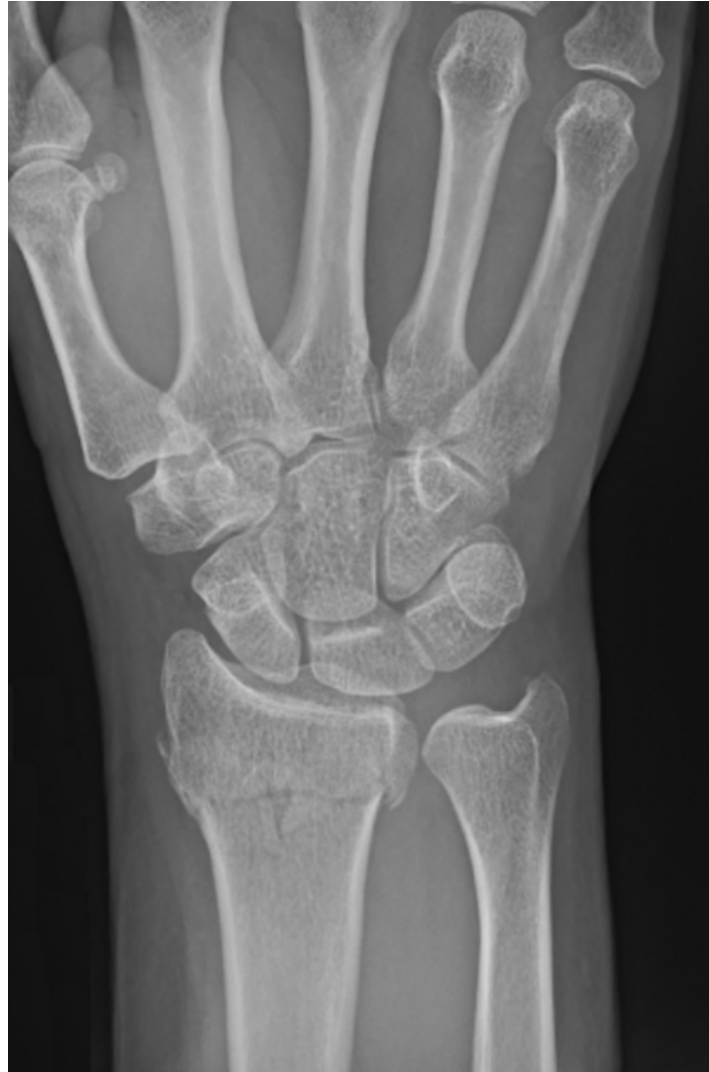

Supplement: 11552_2015_9755_MOESM1_ESM.pdf [file 11552_2015_9755_MOESM1_ESM.pdf]
