# Supplementary material
Source: PubMed Central journal article supplement (PMC4641093)
Supplement: 11552_2015_9755_MOESM2_ESM.pdf [file 11552_2015_9755_MOESM2_ESM.pdf]

Appendix 2. Factors associated with surgical treatment and confidence in recommended treatment

| Demographics (N=270)                           | Mean proportion of cases treated operatively $\pm$ SD | P value          | Mean confidence in selected treatment $\pm$ SD | P value          |
|------------------------------------------------|-------------------------------------------------------|------------------|------------------------------------------------|------------------|
| Sex                                            |                                                       |                  |                                                |                  |
| Women                                          | 0.44 $\pm$ 0.18                                       | 0.61             | 7.4 $\pm$ 1.4                                  | 0.49             |
| Men                                            | 0.46 $\pm$ 0.17                                       |                  | 7.5 $\pm$ 1.1                                  |                  |
| Practice location                              |                                                       |                  |                                                |                  |
| North America                                  | 0.41 $\pm$ 0.15                                       | <b>&lt;0.001</b> | 7.3 $\pm$ 1.2                                  | <b>&lt;0.001</b> |
| Europe                                         | 0.49 $\pm$ 0.18                                       |                  | 7.6 $\pm$ 0.97                                 |                  |
| Other                                          | 0.57 $\pm$ 0.15                                       |                  | 8.2 $\pm$ 1.0                                  |                  |
| Practice years                                 |                                                       |                  |                                                |                  |
| 0-5                                            | 0.44 $\pm$ 0.17                                       | 0.47             | 7.3 $\pm$ 1.0                                  | <b>0.020</b>     |
| 6-10                                           | 0.48 $\pm$ 0.17                                       |                  | 7.6 $\pm$ 1.2                                  |                  |
| 11-20                                          | 0.47 $\pm$ 0.17                                       |                  | 7.8 $\pm$ 0.95                                 |                  |
| 20-30                                          | 0.48 $\pm$ 0.17                                       |                  | 7.4 $\pm$ 1.5                                  |                  |
| Supervise trainees                             |                                                       |                  |                                                |                  |
| Yes                                            | 0.41 $\pm$ 0.20                                       | 0.094            | 7.6 $\pm$ 1.1                                  | 0.17             |
| No                                             | 0.47 $\pm$ 0.17                                       |                  | 7.3 $\pm$ 1.1                                  |                  |
| Specialization                                 |                                                       |                  |                                                |                  |
| General                                        | 0.39 $\pm$ 0.15                                       | 0.18             | 7.7 $\pm$ 1.0                                  | 0.23             |
| Traumatology                                   | 0.48 $\pm$ 0.17                                       |                  | 7.6 $\pm$ 1.0                                  |                  |
| Shoulder-Elbow                                 | 0.45 $\pm$ 0.18                                       |                  | 7.6 $\pm$ 1.0                                  |                  |
| Hand-Wrist                                     | 0.47 $\pm$ 0.16                                       |                  | 7.3 $\pm$ 1.3                                  |                  |
| Other                                          | 0.44 $\pm$ 0.30                                       |                  | 7.9 $\pm$ 1.1                                  |                  |
| Resident                                       | 0.39 $\pm$ 0.20                                       |                  | 7.1 $\pm$ 1.1                                  |                  |
| Number of cases treated operatively ( $\rho$ ) | -                                                     |                  | 0.25                                           | <b>&lt;0.001</b> |
| <b>Work Styles (N=223) (<math>\rho</math>)</b> |                                                       |                  |                                                |                  |
| Octogram                                       |                                                       |                  |                                                |                  |
| Pioneer                                        | 0.24                                                  | <b>&lt;0.001</b> | 0.098                                          | 0.14             |
| Networker                                      | 0.10                                                  | 0.13             | -0.060                                         | 0.37             |
| Achiever                                       | 0.11                                                  | 0.10             | 0.12                                           | 0.082            |
| Strategist                                     | -0.13                                                 | <b>0.044</b>     | -0.0042                                        | 0.95             |
| Anchor                                         | -0.089                                                | 0.19             | 0.043                                          | 0.52             |
| Analyst                                        | -0.18                                                 | <b>0.0071</b>    | -0.027                                         | 0.69             |
| Team Player                                    | -0.017                                                | 0.80             | -0.063                                         | 0.35             |
| Helper                                         | -0.045                                                | 0.50             | -0.10                                          | 0.12             |

Confidence scale 0-10, higher score indicates more confidence;  $\rho$  indicates Pearson correlation; **bold** indicates significant association; SD = standard deviation.
